# Supplementary material for: Pyrolysis of tea and coffee wastes: effect of physicochemical properties on kinetic and thermodynamic characteristics
Source: Springer Nature journal article supplement (doi:10.1007/s10973-022-11878-4), 2023-02-10
Supplement: MOESM1 [file 10973_2022_11878_MOESM1_ESM.pdf]

## Supplementary Information

# Pyrolysis of tea and coffee wastes: Effect of physicochemical properties on kinetic and thermodynamic characteristics

**Asma Ben Abdallah**<sup>1,2</sup> · **Aïda Ben Hassen Trabelsi**<sup>2</sup> · **María Victoria Navarro**<sup>3,\*</sup> · **Alberto Veses**<sup>3</sup> · **Tomás García**<sup>3</sup> · **Daoued Mihoubi**<sup>2</sup>

<sup>1</sup> Department of Energy Engineering, National Engineering School of Monastir, University of Monastir, Monastir 5000, Tunisia

<sup>2</sup> Laboratory of Wind Energy Management and Waste Energy Recovery (LMEEVED), Research and Technology Center of Energy (CRTEEn), B.P. 95, 2050, Hammam-Lif, Tunisia

<sup>3</sup> Instituto de Carboquímica (ICB-CSIC), C/ Miguel Luesma Castán, 50018 Zaragoza, Spain

\* Corresponding author: [navarro@icb.csic.es](mailto:navarro@icb.csic.es)

**Table S1** List of the different isoconversional methods used in the current study.

| Methods      | Expressions     | Approximations used                                                                                                  | Comments                                                                                                                                                                                                                                                                                       |                                                                                                                |
|--------------|-----------------|----------------------------------------------------------------------------------------------------------------------|------------------------------------------------------------------------------------------------------------------------------------------------------------------------------------------------------------------------------------------------------------------------------------------------|----------------------------------------------------------------------------------------------------------------|
| Integral     | KAS [1,2]       | $\ln\left(\frac{\beta}{T^2}\right) = \ln\left(\frac{R \cdot A}{E_a g(\alpha)}\right) - \frac{E_a}{RT}$               | Murray and White approximation [3]:<br>$p(x) \cong \frac{\exp(-x)}{x^2}$                                                                                                                                                                                                                       | The $E_a$ is calculated from the slope of the plot $\ln(\frac{\beta}{T^2})$ vs. $T^{-1}$ , for each $\alpha$ . |
|              | FWO [4,5]       | $\ln(\beta) = \ln\left(\frac{A \cdot E_a}{R \cdot g(\alpha)}\right) - 1.0518 \frac{E_a}{RT} - 5.33$                  | Doyle approximation [6]:<br>$p(x) \cong \exp(-2.315 + 0.4567x)$                                                                                                                                                                                                                                | The plot of $\ln(\beta)$ vs. $T^{-1}$ , for each $\alpha$ gives a slope from which $E_a$ is estimated          |
|              | Starink [7]     | $\ln\left(\frac{\beta}{T^{1.8}}\right) = C_s - 1.0037 \frac{E_a}{RT}$                                                | Similarly to KAS and FWO methods                                                                                                                                                                                                                                                               | By plotting $\ln(\frac{\beta}{T^{1.8}})$ vs. $T^{-1}$ , $E_a$ can be determined from the slope                 |
|              | Vyazovkin [8,9] | $\Phi(E_a) = \sum_{i=1}^n \sum_{j \neq i}^n \frac{I(E_a, T_{a,i}) \beta_j}{I(E_a, T_{a,j}) \beta_i}$                 | Senum-Yang approximation [10]:<br>$I(E_a, T_a) = p(x) = a \left(\frac{b}{c}\right)$<br>$a = \exp(-x)/x$<br>$b = x^7 + 70x^6 + 1886x^5 + 24920x^4 + 170136x^3 + 577584x^2 + 844560x + 357120$<br>$c = x^8 + 72x^7 + 2024x^6 + 28560x^5 + 21672x^4 + 880320x^3 + 1794240x^2 + 1572480x + 403200$ | The value of apparent $E_a$ for each $\alpha$ is obtained by minimizing $\Phi(E_a)$                            |
| Differential | Friedman [11]   | $\ln\left[\beta_i \cdot \left(\frac{d\alpha}{dT}\right)_{\alpha,i}\right] = \ln(f(\alpha) \cdot A) - \frac{E_a}{RT}$ | —                                                                                                                                                                                                                                                                                              | The plot of $\ln(\frac{d\alpha}{dt})$ vs. $T^{-1}$ gives a slope from which $E_a$ is evaluated                 |

**Table S2** Statistical treatment of different isoconversional methods at given conversion.

| Biomass     | $R^2$ |      |      |      |         |      | Error/%  |      |           |      |
|-------------|-------|------|------|------|---------|------|----------|------|-----------|------|
|             | KAS   |      | FWO  |      | Starink |      | Friedman |      | Vyazovkin |      |
|             | Min   | Max  | Min  | Max  | Min     | Max  | Min      | Max  | Min       | Max  |
| SGT         | 0.99  | 1.00 | 0.99 | 1.00 | 0.99    | 1.00 | 0.98     | 1.00 | 0.00      | 1.30 |
| pure SCG    | 0.97  | 1.00 | 0.97 | 1.00 | 0.97    | 1.00 | 0.96     | 1.00 | 0.10      | 2.83 |
| blended SCG | 0.96  | 1.00 | 0.96 | 1.00 | 0.96    | 1.00 | 0.94     | 1.00 | 0.01      | 3.87 |
| CH          | 0.95  | 1.00 | 0.96 | 1.00 | 0.95    | 1.00 | 0.93     | 1.00 | 0.08      | 4.85 |

**Table S3** Experimental-simulation fit quality at different heating rates.

| Biomass wastes | $\beta/^\circ\text{C min}^{-1}$ | Fitting between experimental and simulated data |                         |       |
|----------------|---------------------------------|-------------------------------------------------|-------------------------|-------|
|                |                                 | MAE/ $\text{min}^{-1}$                          | RMSE/ $\text{min}^{-1}$ | $R^2$ |
| SGT            | 10                              | 0.17                                            | 0.19                    | 0.99  |
|                | 25                              | 0.67                                            | 0.76                    | 0.96  |
|                | 50                              | 1.37                                            | 1.70                    | 0.96  |
|                | 100                             | 2.35                                            | 3.14                    | 0.98  |
| pure SCG       | 10                              | 0.23                                            | 0.25                    | 1.00  |
|                | 25                              | 0.73                                            | 0.85                    | 0.99  |
|                | 50                              | 2.02                                            | 2.49                    | 1.00  |
|                | 100                             | 4.15                                            | 4.70                    | 1.00  |
| blended SCG    | 10                              | 0.48                                            | 0.55                    | 1.00  |
|                | 25                              | 1.77                                            | 2.08                    | 1.00  |
|                | 50                              | 4.35                                            | 5.09                    | 1.00  |
|                | 100                             | 9.83                                            | 11.49                   | 0.99  |
| CH             | 10                              | 0.11                                            | 0.14                    | 1.00  |
|                | 25                              | 0.72                                            | 0.84                    | 1.00  |
|                | 50                              | 2.35                                            | 2.79                    | 1.00  |
|                | 100                             | 2.54                                            | 3.01                    | 1.00  |

**Table S4** Pre-exponential factors,  $A/s^{-1}$ , using the activation energy from Friedman method.

| $\alpha$ | SGT                 | pure SCG            | blended SCG         | CH                  |
|----------|---------------------|---------------------|---------------------|---------------------|
| 10       | $5,4 \cdot 10^{12}$ | $1,1 \cdot 10^{18}$ | $5,4 \cdot 10^{21}$ | $1,2 \cdot 10^{20}$ |
| 15       | $9,3 \cdot 10^{13}$ | $6,8 \cdot 10^{19}$ | $1,9 \cdot 10^{23}$ | $4,6 \cdot 10^{19}$ |
| 20       | $1,9 \cdot 10^{18}$ | $1,3 \cdot 10^{21}$ | $4,0 \cdot 10^{22}$ | $2,7 \cdot 10^{18}$ |
| 25       | $4,8 \cdot 10^{19}$ | $3,2 \cdot 10^{21}$ | $1,2 \cdot 10^{22}$ | $8,4 \cdot 10^{17}$ |
| 30       | $1,9 \cdot 10^{20}$ | $3,6 \cdot 10^{21}$ | $5,3 \cdot 10^{21}$ | $7,3 \cdot 10^{17}$ |
| 35       | $4,2 \cdot 10^{20}$ | $1,6 \cdot 10^{21}$ | $3,3 \cdot 10^{21}$ | $7,7 \cdot 10^{17}$ |
| 40       | $1,2 \cdot 10^{20}$ | $7,0 \cdot 10^{20}$ | $4,8 \cdot 10^{21}$ | $6,9 \cdot 10^{17}$ |
| 45       | $1,7 \cdot 10^{20}$ | $1,2 \cdot 10^{21}$ | $2,2 \cdot 10^{22}$ | $6,3 \cdot 10^{17}$ |
| 50       | $1,1 \cdot 10^{20}$ | $4,6 \cdot 10^{21}$ | $2,4 \cdot 10^{23}$ | $6,9 \cdot 10^{17}$ |
| 55       | $3,5 \cdot 10^{19}$ | $6,1 \cdot 10^{22}$ | $2,8 \cdot 10^{23}$ | $4,9 \cdot 10^{17}$ |
| 60       | $1,2 \cdot 10^{19}$ | $1,2 \cdot 10^{23}$ | $3,0 \cdot 10^{23}$ | $3,1 \cdot 10^{17}$ |
| 65       | $1,4 \cdot 10^{19}$ | $1,0 \cdot 10^{22}$ | $4,3 \cdot 10^{25}$ | $3,2 \cdot 10^{17}$ |
| 70       | $5,4 \cdot 10^{20}$ | $5,4 \cdot 10^{24}$ | $8,0 \cdot 10^{23}$ | $2,0 \cdot 10^{17}$ |
| 75       | $7,4 \cdot 10^{23}$ | $1,5 \cdot 10^{21}$ | $8,3 \cdot 10^{23}$ | $1,3 \cdot 10^{16}$ |
| 80       | $4,8 \cdot 10^{24}$ | $2,5 \cdot 10^{20}$ | $6,0 \cdot 10^{26}$ | $1,8 \cdot 10^{15}$ |
| 85       | $4,6 \cdot 10^{26}$ | $2,8 \cdot 10^{22}$ | $2,2 \cdot 10^{31}$ | $1,4 \cdot 10^{13}$ |
| 90       | $4,7 \cdot 10^{29}$ | $1,1 \cdot 10^{25}$ | $1,9 \cdot 10^{32}$ | $3,2 \cdot 10^{10}$ |

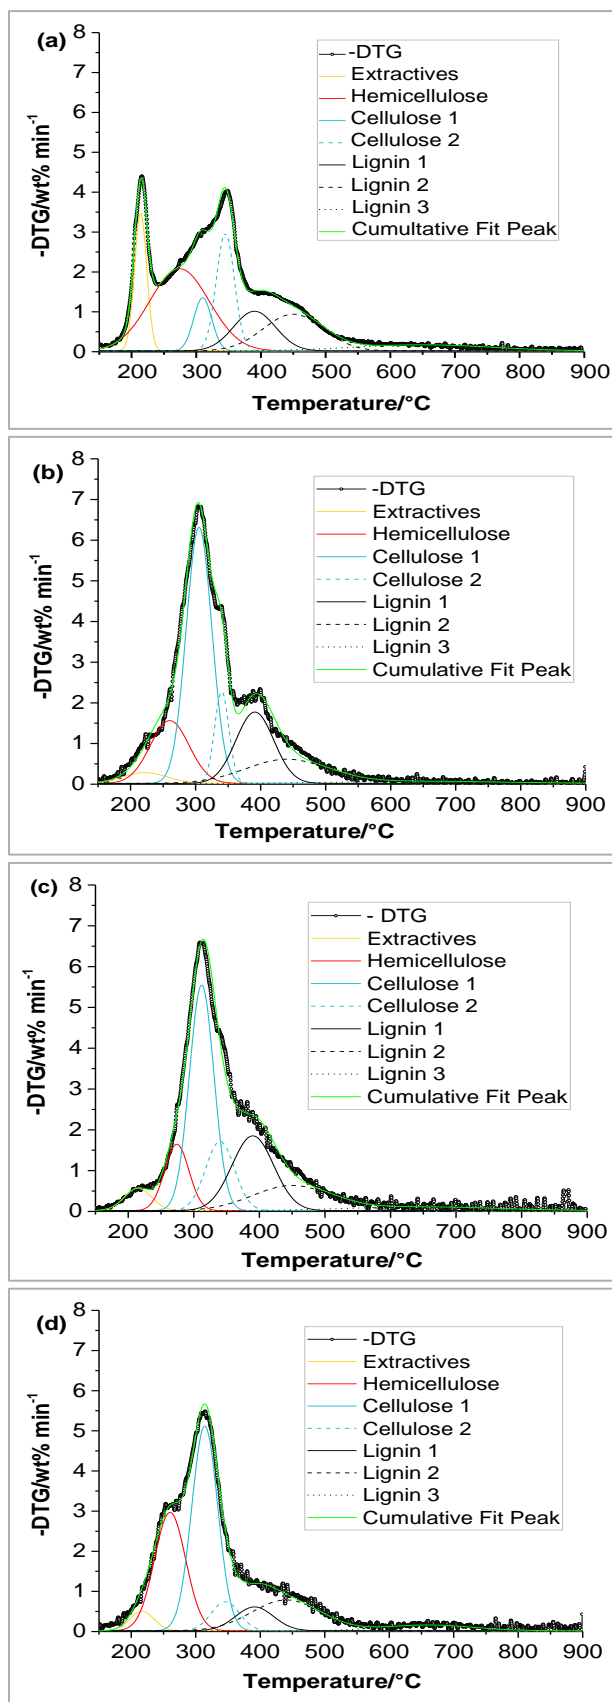

**Fig. S1** Deconvolution of DTG curves of (a) SGT, (b) pure SCG, (c) blended SCG and (d) CH at 10 °C min<sup>-1</sup>

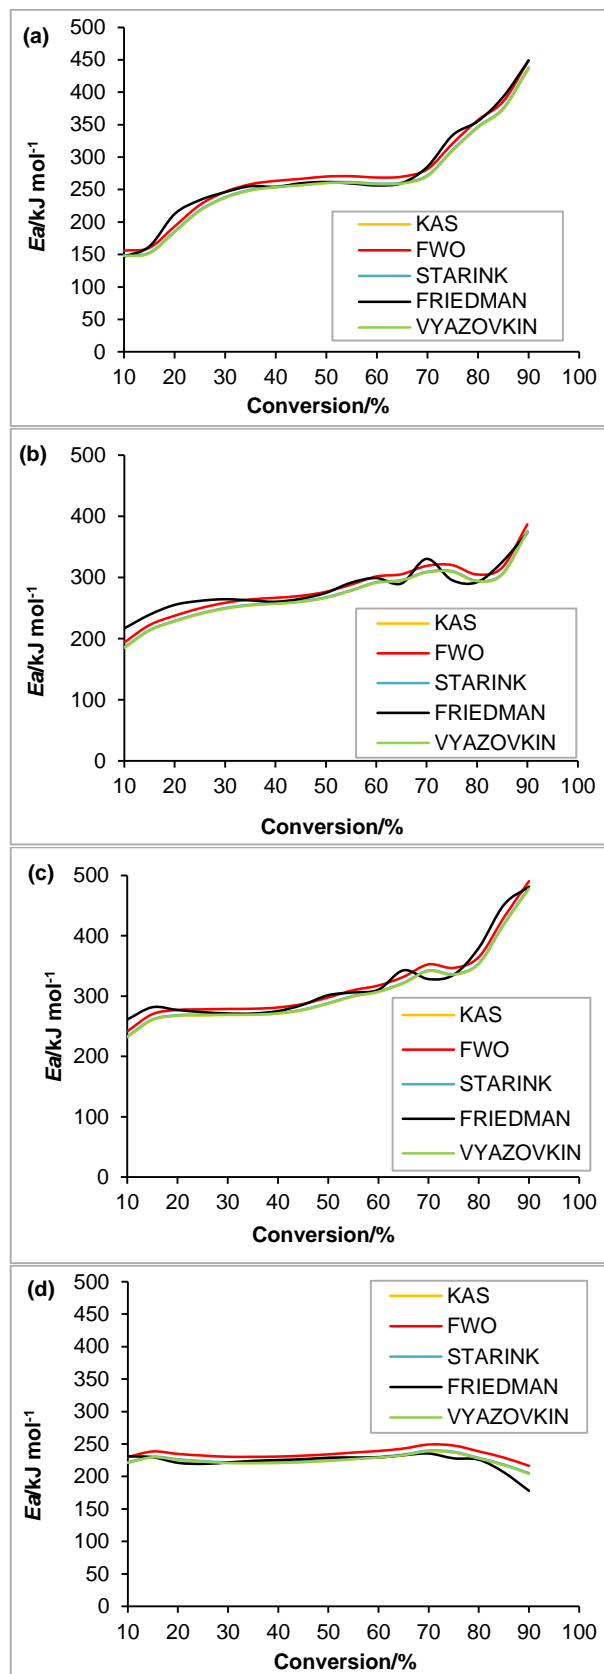

**Fig. S2**  $E_a$  as a function of conversion for (a) SGT, (b) pure SCG, (c) blended SCG and (d) CH from different isoconversional methods

## References

1. Kissinger HE. Reaction kinetics in differential thermal analysis. *Anal Chem.* 1957;29:1702–6.
2. Akahira T, Sunose T. Joint convention of four electrical institutes. *Sci Technol.* 1971;16:22–31.
3. Murray P WJ. Kinetics of the thermal dehydration of clays. Part IV. Interpretation of the differential thermal analysis of the clay mineral. *Trans Br Ceram Soc.* 1955;54:204–38.
4. Flynn JH, Wall LA. A quick, direct method for the determination of activation energy from thermogravimetric data. *J Polym Sci Part B Polym Lett.* 1966;4:323–8.
5. Ozawa T. A new method of analyzing thermogravimetric data. *Bull Chem Soc Jpn.* 1965;38:1881–6.
6. Doyle CD. Estimating isothermal life from thermogravimetric data. *J Appl Polym Sci.* 1962;6:639–42.
7. Starink MJ. The determination of activation energy from linear heating rate experiments: a comparison of the accuracy of isoconversion methods. *Thermochim Acta.* 2003;404:163–76.
8. Vyazovkin S. A Unified Approach to Nonisothermal Data. *Unified Kinetic Processing.* 1995;95–101.
9. Vyazovkin S, Wight CA. Model-free and model-fitting approaches to kinetic analysis of isothermal and nonisothermal data. *Thermochimica Acta.* 1999;340–341:53–68.
10. Senum GI, Yang RT. Rational approximations of the integral of the Arrhenius function. *J Thermal Anal.* 1977.



11. Friedman HL. Kinetics of thermal degradation of char-forming plastics from thermogravimetry. Application to a phenolic plastic. *J Polym Sci Part C Polym Symp.* 2007;6:183–95.
